# Supplementary material
Source: Frontiers journal article supplement (https://www.frontiersin.org/articles/471604)
Supplement: Data_Sheet_1.PDF [file Data_Sheet_1.PDF]

# Implementation of Metallic Vertical Interconnect Access in Hybrid Intercalated Graphene/Quantum Dot Photodetector for Improved Charge Collection

## Supporting Information

Wenjun Chen, Seungbae Ahn, Carlos Rangel, Oscar Vazquez-Mena\*

Department of Nano Engineering, Center for Memory and Recording Research, Calibaja Center for Resilient Materials and Systems, University of California San Diego, 9500 Gilman Drive, La Jolla, CA 92093, United States

### Supp-Info SI.1: SEM images of QDs film

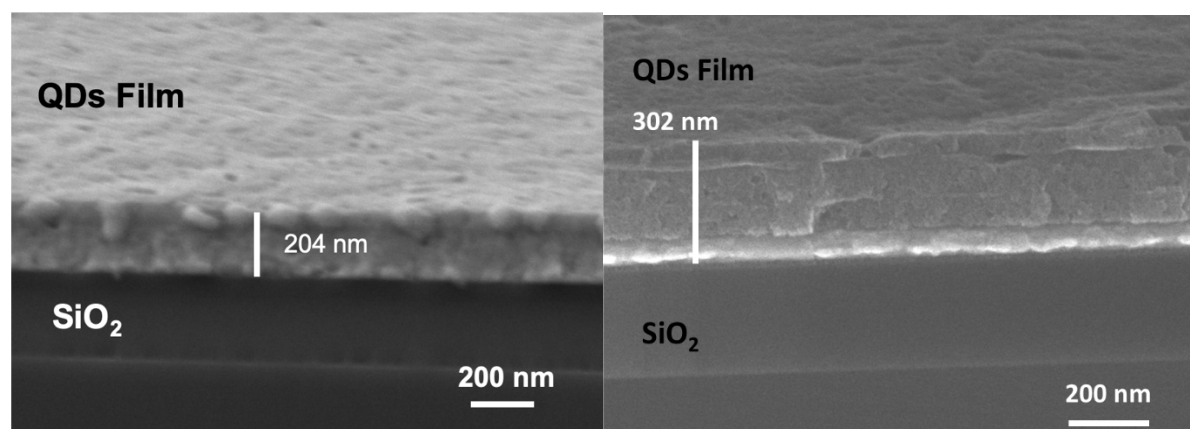

**Cross-section of QD films. Left:** Bottom Device consisting of a graphene followed with 10 layers of PbS QDs on top. The measured thickness of the film is  $\sim 204$  nm. This indicates that each layer is  $\sim 20$  nm thick. **Right:** Intercalated Gr/QD devices fabricated by repeating the deposition of 1 layer of CVD graphene and 3 layers of PbS QDs sequentially into 5 stacks, for a total of 15 PbS QD layers. The total measured thickness is  $\sim 302$  nm, giving a measured graphene interspacing of  $D_{Gr} \approx 302/5 = 60.4$  nm. From these results we assume that the thickness of each individual QD layer is  $\sim 20$  nm. We neglect the contribution of graphene to the device thickness.

## Supp-Info SI.2: Light penetration depth and transmission in QDs film

a)

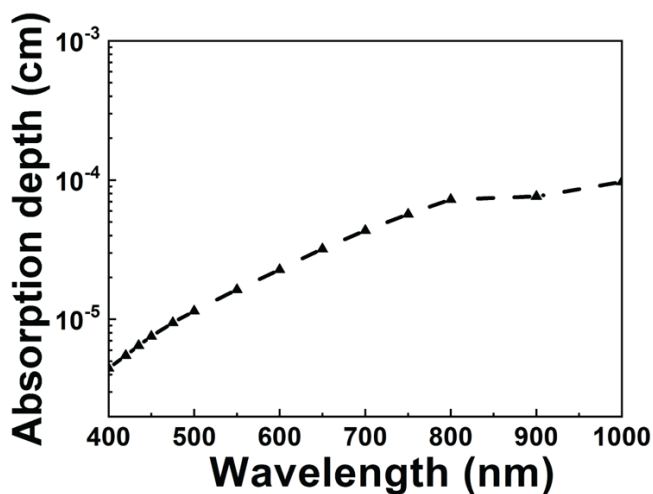

b)

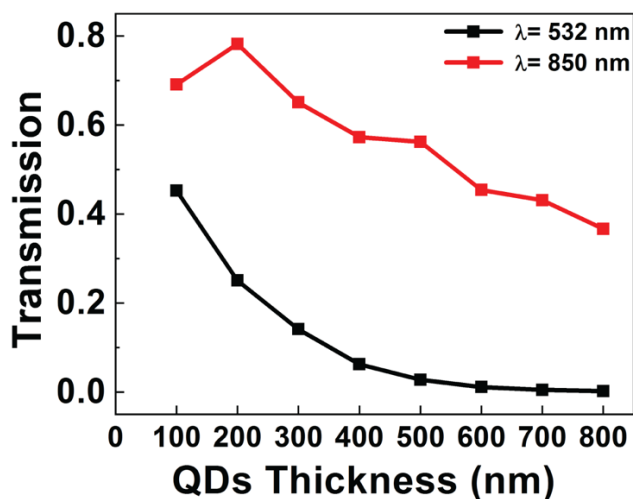

a) **Light penetration depth in PbS QDs film:** Penetration as a function of wavelength was extracted from transmission of light as a function of thickness of PbS QDs films by fitting to the Beer-Lambert Law. b) **Transmission vs thickness.** Transmission for  $\lambda=532$  nm and  $\lambda=850$  nm light for quantum dot films with band gap at  $\lambda=1000$  nm used in this work. Visible  $\lambda=532$  nm light is strongly absorbed with a 200 nm thick film with only 22% transmission. However, with  $\lambda=850$  nm light, a significant amount of light is wasted, with large 80% transmission at 200 nm thickness. Going to thicker films it would be possible to absorb more NIR light.

Supp-Info SI.3: Photoresponse dependence on light intensity

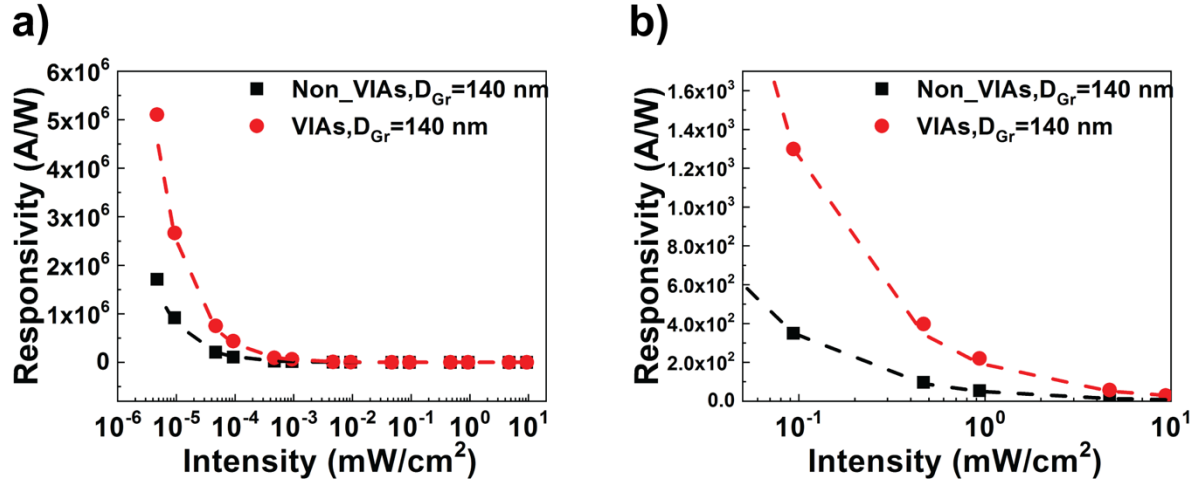

**Photoresponse dependence on light intensity:** Photoresponsivity increases as incident power decreases. Same data as Figure 4.c but plotted in log-linear scale: a) Light intensity from  $10^{-6}$  to  $10$  mW/cm<sup>2</sup>, and b) Light intensity from  $10^{-1}$  to  $10$  mW/cm<sup>2</sup>.

Supp-Info SI.4:  $I_{DS}$  and  $I_{Gate}$  as a function of back-gate voltage

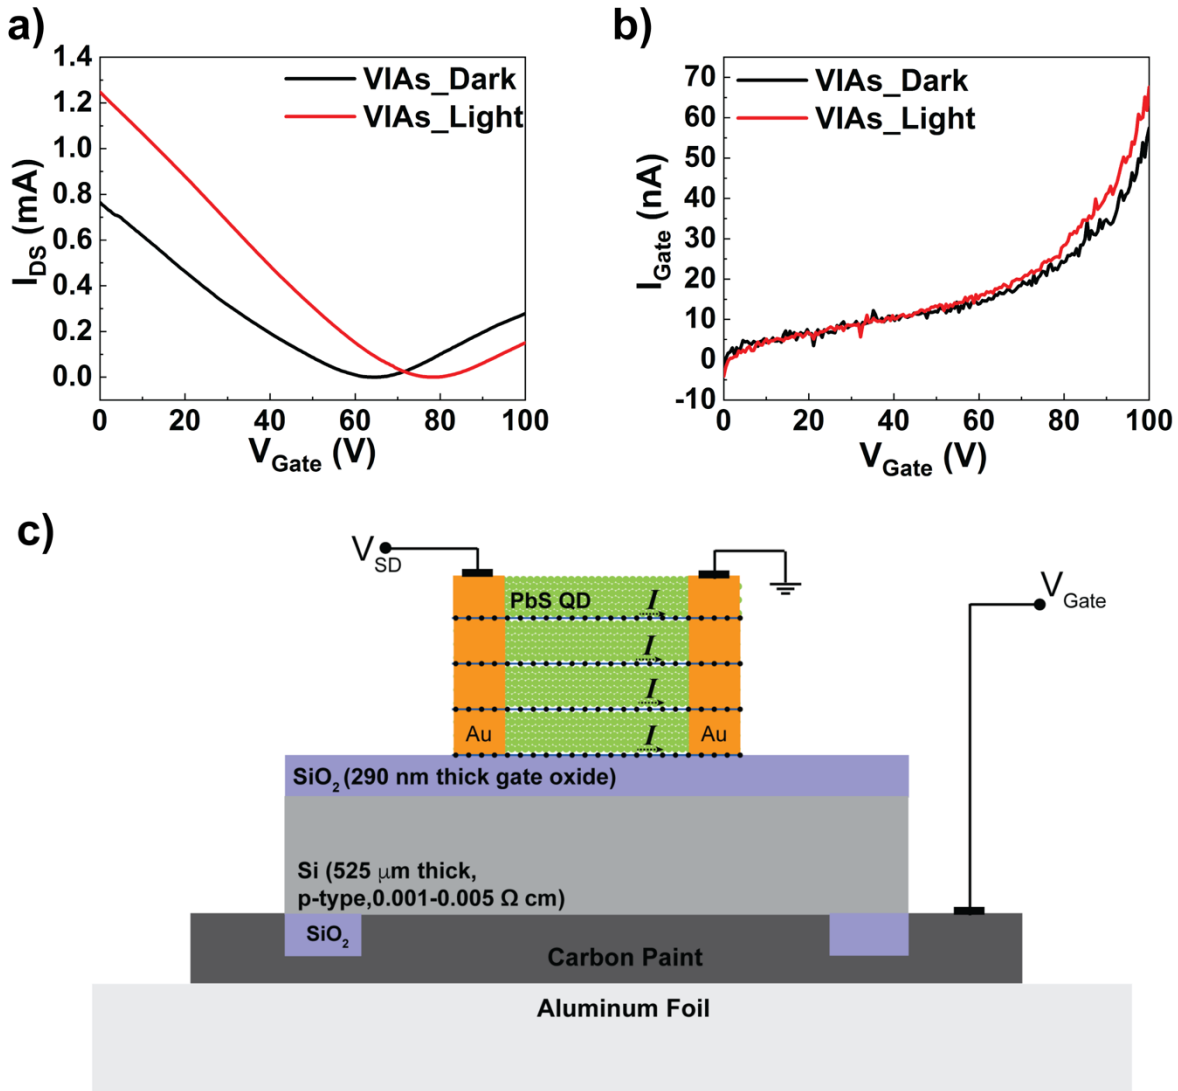

**$I_{DS}$  and  $I_{Gate}$  as a function of back-gate voltage:** a)  $I_{DS}$  vs  $V_G$  in light and dark conditions for VIAs devices. b)  $I_{Gate}$  vs  $V_G$  in light and dark conditions for VIAs devices, indicating that the leakage through the back gate is minimal with respect to the main drain current in a). c) Schematic configuration of back-gated VIAs device, backside SiO<sub>2</sub> was partially scratched and attached to aluminum foil by carbon paint. The gate voltage was applied to the aluminum foil.
